# Supplementary material for: Clinical Efficacy of Allergen-Specific Immunotherapy from Patient and Physician Perspectives
Source: PubMed Central journal article supplement — Yonsei Med J. 2019 Apr 19;60(5):446–53. doi: 10.3349/ymj.2019.60.5.446 (PMC6479127; doi:10.3349/ymj.2019.60.5.446), 2019-04-19
Supplement: ymj-60-446-s001.pdf [file ymj-60-446-s001.pdf]

## SUPPLEMENTARY MATERIALS

For doctor (please fill the blank in each patient)

1. What is your specialty?

- ① Internal medicine  
② Pediatrics  
③ Otorhinolaryngology  
④ Dermatology  
⑤ Others ( )

2. What is your type of hospital?

- ① University hospital  
② General hospital  
③ Private clinic

3. What is the product (or company) of AIT?

- ① Allergopharma (Novo-Helisen®)  
② Allergy Therapeutics (Alavac®, Tyrosine®)  
③ Hollister-Stier

4. Please write the asthma severity according to GINA guidelines

|                | Before AIT | After AIT |
|----------------|------------|-----------|
| Asthma (GINA)* |            |           |

5. Please write the allergic rhinitis severity according to ARIA guidelines

|                 | Before AIT | After AIT |
|-----------------|------------|-----------|
| Rhinitis (ARIA) |            |           |

6. What did you prescribe for asthma drugs before starting AIT and after maintaining AIT?

|                        | Before AIT | After maintaining AIT |
|------------------------|------------|-----------------------|
| Inhaled beta agonist   | Yes/No     | Yes/No                |
| Inhaled corticosteroid | Yes/No     | Yes/No                |
| LTRA                   | Yes/No     | Yes/No                |
| Theophylline           | Yes/No     | Yes/No                |
| Others ( )             | Yes/No     | Yes/No                |

7. What did you prescribe for allergic rhinitis drugs before starting AIT and after maintaining AIT?

|                           | Before AIT | After maintaining AIT |
|---------------------------|------------|-----------------------|
| Intranasal corticosteroid | Yes/No     | Yes/No                |
| Oral antihistamine        | Yes/No     | Yes/No                |
| LTRA                      | Yes/No     | Yes/No                |
| Others ( )                | Yes/No     | Yes/No                |

8. How was the adherence of this patient about AIT?

- ① Excellent  
② Good  
③ Fair  
④ Poor  
⑤ Very poor

9. Are you satisfied with the result of AIT in this patient?

- ① Excellent  
② Good  
③ Fair  
④ Poor  
⑤ Very poor

10. Did this patient have side effects during AIT?

- ① Yes ② No

If yes, what was the type of adverse reaction?

- ① Localized itching & redness ② Generalized urticaria/angioedema  
③ Dyspnea/abdominal pain ④ Anaphylaxis  
⑤ Cardiac arrest/death

### For patient

1. Have you ever performed an experience to an AIT?

- ① Yes ② No

2. Do your family have allergic diseases such as allergic rhinitis, asthma, conjunctivitis, food allergy or atopic dermatitis?

- ① Yes ② No

3. How did you get an information about AIT?

- ① General/University hospital doctor ② Private clinic doctor  
③ Acquaintance ④ Internet/media  
⑤ Other patients ⑥ Others ( )

4. When did you get symptoms of your allergic disease?

Asthma (age:      yr)      Allergic rhinitis (age:      yr)      atopic dermatitis (age:      yr)

5. What is your diagnosis of disease?

- ① Asthma ② Allergic rhinitis  
③ Atopic dermatitis ④ Urticaria  
⑤ Food allergy ⑥ Venom hypersensitivity

6. How long did you get AIT?

(      ) years (      ) months

7. How was your adherence to AIT?

- ① Excellent ② Good  
③ Fair ④ Poor  
⑤ Very poor

8. How was your allergic symptom after AIT?

1) Asthma

|           | Much improved | Improved | No difference | Aggravated | Much aggravated |
|-----------|---------------|----------|---------------|------------|-----------------|
| Day Sx.   |               |          |               |            |                 |
| Night Sx. |               |          |               |            |                 |
| SABA use  |               |          |               |            |                 |
| Attack    |               |          |               |            |                 |
| QOL       |               |          |               |            |                 |

2) Allergic rhinitis

|             | Much improved | Improved | No difference | Aggravated | Much aggravated |
|-------------|---------------|----------|---------------|------------|-----------------|
| Rhinorrhea  |               |          |               |            |                 |
| Obstruction |               |          |               |            |                 |
| Sneezing    |               |          |               |            |                 |
| Itching     |               |          |               |            |                 |
| Eye itching |               |          |               |            |                 |
| Eye redness |               |          |               |            |                 |

9. When was the first time you ever felt an improvement in allergic symptom?

|                   | < 3 M | 3–6 M | 6–12 M | 1–2 yrs | > 2 yrs |
|-------------------|-------|-------|--------|---------|---------|
| Asthma            |       |       |        |         |         |
| Allergic rhinitis |       |       |        |         |         |

10. Are you satisfied with the results of the immunotherapy?

|                   | Excellent | Good | Fair | Poor | Very poor |
|-------------------|-----------|------|------|------|-----------|
| Asthma            |           |      |      |      |           |
| Allergic rhinitis |           |      |      |      |           |

11. What is your subjective opinion on the medical aspects of AIT?

|                  | Excellent | Good | Fair | Poor | Very poor |
|------------------|-----------|------|------|------|-----------|
| ER visit         |           |      |      |      |           |
| Drug demand      |           |      |      |      |           |
| Adverse reaction |           |      |      |      |           |

12. What is your subjective opinion on the economic and methodologic aspects of AIT?

|                | Excellent | Good | Fair | Poor | Very poor |
|----------------|-----------|------|------|------|-----------|
| Time-consuming |           |      |      |      |           |
| Cost           |           |      |      |      |           |
| Method of AIT  |           |      |      |      |           |

13. Did you have an adverse reaction during AIT?

① Yes

② No

If yes, what was the type of adverse reaction?

① Localized itching & redness

② Generalized urticaria/angioedema

③ Dyspnea/abdominal pain

④ Anaphylaxis

⑤ Cardiac arrest/death

14. Will you continue to maintain immunotherapy in the future?

① Yes

② So-so

③ No

15. Are you willing to recommend immunotherapy to other patients?

① Yes

② So-so

③ No
